# Supplementary material for: Au–Hg/rGO with enhanced peroxidase-like activity for sensitive colorimetric determination of H2O2
Source: Royal Society of Chemistry journal article supplement (doi:10.1039/d0an00235f), 2020-01-01
Supplement: d0an00235f1.pdf [file d0an00235f1.pdf]

## **Electronic Supplementary Material**

**Au-Hg/rGO with enhanced peroxidase-like activity for sensitively colorimetric  
determination of H<sub>2</sub>O<sub>2</sub>**

Fen-Ying Kong, Lei Yao, Xin-Yang Lu, Heng-Ye Li, Zhong-Xia Wang, Hai-Lin  
Fang, Wei Wang\*

*School of Chemistry and Chemical Engineering, Yancheng Institute of Technology,  
Yancheng 224051, China*

## Condition optimization

Like natural enzyme or other nanozyme, the peroxidase-like activity of Au-Hg/rGO nanocomposites was also affected by the pH of the buffer and the reaction temperature.<sup>1</sup> Therefore, to obtain the highest catalytic activity, the effects of difference pH (2.0-8.0) and temperature (15-40 °C) were studied. As shown in Fig. S1A, the maximum relative activity of Au-Hg/rGO nanocomposites was observed at pH 5.0, and the relative activity greatly decreased in relatively strong acidic or alkaline conditions. In the stronger acidic environment, the oxidation of TMB is not ready to occur. In the alkaline condition, H<sub>2</sub>O<sub>2</sub> can be easily decomposed into oxygen.<sup>2</sup> From Fig. S1B, it can be clearly seen that an increase of temperature from 15 °C to 20 °C resulted in the increased relative activity whereas a further increase of temperature caused a decreased relative activity. At high temperatures, H<sub>2</sub>O<sub>2</sub> is apt to decompose into H<sub>2</sub>O and O<sub>2</sub>. At low temperatures, the electron transfer rate is limited.<sup>3</sup> So, subsequent experiments were conducted using Au-Hg/rGO nanocomposites at pH 5.0 and reaction temperature of 20 °C as the optimum analytical conditions.

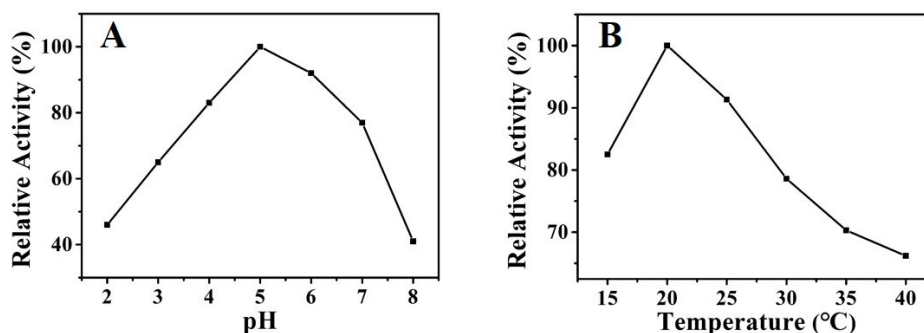

**Fig. S1** Effects of pH (A) and temperature (B) on the peroxidase-like activity of Au-Hg/rGO nanocomposites.

## References

1. Y. N. Ding, H. Liu, L. N. Gao, M. Fu, X. L. Luo, X. X. Zhang, Q. Y. Liu and R. C. Zeng, *J. Alloy Compd.*, 2019, 785, 1189.
2. F. Honarasa, F. H. Kamshoori, S. Fathi and Z. Motamedifar, *Microchim. Acta*,

2019, 186, 234.

3. S. L. Li, H. Li, F. J. Chen, J. Liu, H. L. Zhang, Z. Y. Yang and B. D. Wang, *Dyes Pigments*, 2016, 125, 64.
